# Supplementary material for: Pulse Doppler ultrasound as a tool for the diagnosis of chronic testicular dysfunction in stallions
Source: PLoS One. 2017 May 30;12(5):e0175878. doi: 10.1371/journal.pone.0175878 (PMC5448730; doi:10.1371/journal.pone.0175878)
Supplement: S1 File — Dataset and Summary statistic of Fig 3. Dataset and Summary statistic of Table 4. Dataset and Summary statistic of Fig 4. Dataset and Summary statistic of Table 5. Dataset and Summary statistic of Fig 5. Dataset and Summary statistic of Figs 6, 7 and 8. Dataset and Summary statistic of Table 8. (XLSX) [file pone.0175878.s003.xlsx]

## Sheet: DOPPLER
Nº semental	Sano/patológico	Edad (años)	Tésticulo	IP/CT	IR/CT	PVS/CT	VDF/CT	TAMV/CT	IP/PT	IR/PT	PVS/PT	VDF/PT	TAMV/PT	IP/IT	IR/IT	PVS/IT	VDF/IT	TAMV/IT	ø arteria (cm)	A (cm2)	TABF	TABF ratio
1	1	7	TI	2.42	0.82	20.5	3.6	7	1.28	0.67	18.4	6.1	9.6	0.61	0.43	8.1	4.6	5.7	0.32	0.080425	0.77208	0.225195
1	1	7	TI	2.37	0.82	20.5	3.6	7.1	1.53	0.72	18.1	5	8.6	0.76	0.5	8.7	4.3	5.7	0.32	0.080425	0.691655	0.201737
1	1	7	TI	2.21	0.82	20.1	3.6	7.5	1.51	0.71	18.1	5.3	8.5	0.78	0.5	8.7	4.3	5.5	0.32	0.080425	0.683612	0.199391
1	1	7	TD	2.08	0.72	29.1	8	10.1	1.05	0.58	22.6	9.5	12.4	0.74	0.51	11.1	5.4	7.7	0.35	0.0962115	1.19302	0.347972
1	1	7	TD	2.31	0.76	30.3	7.4	9.9	1.1	0.58	23.7	9.8	12.6	0.7	0.5	10.9	5.4	7.8	0.35	0.0962115	1.21226	0.353585
1	1	7	TD	2.03	0.76	30.3	7.4	11.3	1.06	0.6	21.1	8.4	12	0.85	0.51	10.6	5.2	6.4	0.35	0.0962115	1.15454	0.336747
2	1	17	TI	2.87	0.87	29.5	3.8	8.9	1.15	0.61	20.6	8.1	10.8	1.04	0.57	9.4	4.1	5.1	0.31	0.0754769	0.815151	0.330838
2	1	17	TI	2.81	0.88	30.9	3.8	9.7	1.29	0.64	20.6	7.4	10.3	1.2	0.67	10.3	3.4	5.8	0.31	0.0754769	0.777412	0.315521
2	1	17	TI	2.99	0.88	31.9	3.8	9.4	1.55	0.66	19.5	6.6	8.3	1.14	0.65	9.7	3.4	5.5	0.31	0.0754769	0.626459	0.254255
2	1	17	TD	2.59	0.79	24.7	5.2	7.6	1.96	0.78	19.7	4.3	7.9	0.71	0.48	7	3.6	4.7	0.31	0.0754769	0.596268	0.242002
2	1	17	TD	2.8	0.86	25.5	3.5	7.9	1.86	0.74	19.1	5	7.6	0.77	0.55	5.3	2.4	3.7	0.31	0.0754769	0.573625	0.232812
2	1	17	TD	2.66	0.8	23.3	4.8	7	1.84	0.74	19.7	5.2	7.9	0.81	0.53	7.7	3.6	5.1	0.31	0.0754769	0.596268	0.242002
3	1	9	TI	1.47	0.72	19.2	5.4	9.4	1.54	0.68	12.9	4.2	5.6	1.01	0.63	11.7	4.3	7.4	0.36	0.101788	0.570012	0.139044
3	1	9	TI	1.62	0.73	18.3	5	8.2	1.24	0.64	12.5	4.5	6.4	1.07	0.64	12	4.3	7.2	0.36	0.101788	0.651442	0.158908
3	1	9	TI	1.59	0.73	16.7	4.6	7.6	1.43	0.72	24.6	7	12.3	0.95	0.61	10.2	4	6.5	0.36	0.101788	1.25199	0.305401
3	1	9	TD	1.94	0.78	19.9	4.4	8	1.07	0.65	20.8	7.3	12.6	1.1	0.65	6.3	2.2	3.7	0.35	0.0962115	1.21226	0.29571
3	1	9	TD	2	0.75	19.4	4.9	7.3	1.22	0.66	15.5	5.3	8.3	1.08	0.65	7.1	2.5	4.3	0.35	0.0962115	0.798555	0.194793
3	1	9	TD	2.4	0.84	20.9	3.4	7.3	1.28	0.68	16.3	5.3	8.6	1.07	0.68	10.4	3.3	6.6	0.35	0.0962115	0.827419	0.201834
4	1	7	TI	1.75	0.74	28.7	7.5	12.1	1.05	0.62	11.7	4.5	6.9	0.52	0.44	9.9	5.6	8.3	0.24	0.045239	0.312149	0.0677275
4	1	7	TI	1.93	0.76	28.7	6.9	11.3	1.03	0.61	13	5	7.7	0.63	0.45	9.6	5.2	6.8	0.24	0.045239	0.348341	0.07558
4	1	7	TI	1.9	0.76	26.2	6.2	10.5	1.06	0.62	12.3	4.7	7.1	0.65	0.48	9	4.6	6.6	0.24	0.045239	0.321197	0.0696906
4	1	7	TD	1.6	0.73	15.5	4.1	7.1	0.82	0.52	16.1	7.8	10.1	0.62	0.48	6.6	3.5	5.1	0.23	0.0415477	0.419631	0.0910481
4	1	7	TD	1.52	0.74	20.4	5.3	9.9	0.87	0.56	13	5.8	8.3	0.59	0.45	9.5	5.2	7.4	0.23	0.0415477	0.344846	0.0748217
4	1	7	TD	1.64	0.73	21.9	5.8	9.8	0.98	0.57	12.6	5.4	7.3	0.7	0.5	9.8	4.9	7	0.23	0.0415477	0.303298	0.065807
5	1	6	TI	2.62	0.8	27.8	5.4	8.5	1.08	0.63	16.5	6.1	9.5	0.77	0.54	8.2	3.7	5.8	0.32	0.080425	0.764037	0.192691
5	1	6	TI	2.49	0.84	26.7	4.4	9	1.28	0.7	14.4	4.3	7.9	0.74	0.53	8.4	4	6	0.32	0.080425	0.635357	0.160237
5	1	6	TI	2.36	0.8	21.8	4.4	7.4	1.27	0.63	17.5	6.5	8.7	0.73	0.52	9.5	4.6	6.7	0.32	0.080425	0.699697	0.176464
5	1	6	TD	1.91	0.78	19.4	4.2	8	1.3	0.68	12.6	4.1	6.6	0.82	0.54	10.2	4.7	6.7	0.35	0.0962115	0.634996	0.160146
5	1	6	TD	1.88	0.77	20.2	4.6	8.3	1.37	0.63	15.5	5.7	7.2	0.67	0.49	10.1	5.2	7.3	0.35	0.0962115	0.692723	0.174705
5	1	6	TD	1.91	0.74	20.4	5.3	7.9	1.29	0.68	16.9	5.4	8.8	0.86	0.58	11.7	4.9	7.9	0.35	0.0962115	0.846661	0.213528
6	1	18	TI	2.42	0.81	28.3	5.4	9.4	1.53	0.69	17.2	5.3	7.7	1.2	0.69	9.3	3	5.5	0.38	0.113412	0.873271	0.200844
6	1	18	TI	2.82	0.83	29.3	4.9	8.7	1.79	0.7	16.8	5	6.6	1.31	0.69	13	4	6.9	0.38	0.113412	0.748518	0.172152
6	1	18	TI	2.93	0.84	26.6	4.3	7.6	1.8	0.71	18.7	5.3	7.4	1.27	0.68	12.7	4	6.8	0.38	0.113412	0.839247	0.193019
6	1	18	TD	2.59	0.82	27.2	4.9	8.6	1.71	0.71	24.7	7.3	10.2	1.05	0.64	12	4.3	7.3	0.35	0.0962115	0.981357	0.225703
6	1	18	TD	2.07	0.76	26.6	6.5	9.7	1.72	0.69	25.4	8	10.1	1.1	0.67	13	4.3	7.8	0.35	0.0962115	0.971736	0.22349
6	1	18	TD	2.43	0.8	27.7	5.4	9.2	1.91	0.78	26.9	5.8	11	1.17	0.72	11.1	3.1	6.8	0.35	0.0962115	1.05833	0.243405
7	1	18	TI	2.75	0.87	40.5	5.2	12.8	2.39	0.81	20.4	3.9	6.9	1.2	0.65	15	5.3	8.1	0.33	0.0855301	0.590157	0.133626
7	1	18	TI	2.65	0.88	38.2	4.5	12.7	1.95	0.78	19.9	4.4	8	0.86	0.56	18.1	7.9	11.8	0.33	0.0855301	0.68424	0.154928
7	1	18	TI	2.92	0.88	45	5.2	13.6	2.51	0.85	18.9	2.9	6.4	0.87	0.58	16.8	7.1	11.2	0.33	0.0855301	0.547392	0.123943
7	1	18	TD	2.3	0.84	15.8	2.5	5.8	1.98	0.8	24.3	4.9	9.8	1.01	0.59	8.5	3.5	4.9	0.31	0.0754769	0.739674	0.16748
7	1	18	TD	2.67	0.85	17.1	2.5	5.5	1.98	0.82	23.8	4.4	9.8	1	0.59	7.9	3.2	4.7	0.31	0.0754769	0.739674	0.16748
7	1	18	TD	2.72	0.88	17.5	2.1	5.7	2.11	0.85	26.2	3.9	10.6	1.04	0.64	8.2	2.9	5.1	0.31	0.0754769	0.800056	0.181151
8	2	15	TD	1.58	0.71	35.9	10.5	16.1	1.15	0.67	12.7	4.2	7.3	0.65	0.49	8.6	4.4	6.4	0.34	0.0907922	0.662783	0.35668
8	2	15	TD	1.68	0.71	22.9	6.5	9.7	1.03	0.63	13.2	4.9	8	0.56	0.46	8.6	4.6	7.1	0.34	0.0907922	0.726338	0.390883
8	2	15	TD	1.51	0.71	24.3	7	11.4	1.15	0.63	19.3	7.2	10.5	0.76	0.58	8.2	3.5	6.2	0.34	0.0907922	0.953319	0.513033
9	2	14	TI	4.125	0.9075	40	3.7	8.8	3.2	0.822857	17.5	3.1	4.5	1.07	0.65	10.1	3.6	6.1	0.16	0.0201062	0.0904781	0.0648821
9	2	14	TI	4.45205	0.912921	35.6	3.1	7.3	3.5	0.864706	17	2.3	4.2	1.15	0.64	9	3.3	5	0.16	0.0201062	0.0844462	0.0605566
9	2	14	TI	2.92727	0.770335	20.9	4.8	5.5	2.27027	0.7	12	3.6	3.7	1.12	0.64	9.8	3.6	5.6	0.16	0.0201062	0.0743931	0.0533475
9	2	14	TD	2.82143	0.752381	21	5.2	5.6	3.06452	0.742188	12.8	3.3	3.1	1.04	0.66	9.7	3.3	6.1	0.16	0.0201062	0.0623293	0.0446966
9	2	14	TD	4.27907	0.884615	20.8	2.4	4.3	2.87879	0.766129	12.4	2.9	3.3	1.16	0.72	8.4	2.3	5.2	0.16	0.0201062	0.0663506	0.0475802
9	2	14	TD	3.97778	0.860577	20.8	2.9	4.5	2.18	0.76	12.6	3.1	4.4	1.25	0.74	7.7	2	4.6	0.16	0.0201062	0.0884675	0.0634403
10	2	14	TI	2.65	0.88	23.9	2.9	7.9	1.49	0.77	15.1	4.3	7.3	0.65	0.46	7.6	4.1	5.3	0.31	0.0754769	0.550982	0.164443
10	2	14	TI	2.62	0.84	26.2	4.1	8.5	1.91	0.77	15.9	3.6	6.4	0.64	0.5	7.4	3.7	5.7	0.31	0.0754769	0.483052	0.144169
10	2	14	TI	2.87	0.87	26.8	3.5	8.1	1.98	0.77	14.4	3.2	5.6	0.62	0.46	6.4	3.4	4.7	0.31	0.0754769	0.422671	0.126148
10	2	14	TD	1.57	0.71	24.2	6.9	11	1.43	0.68	12.3	3.9	5.9	0.64	0.43	5.7	3.2	3.9	0.27	0.0572557	0.337808	0.10082
10	2	14	TD	1.7	0.73	21.2	5.6	9.2	1.15	0.64	13.6	4.8	7.6	0.78	0.54	20.3	9.3	14.1	0.27	0.0572557	0.435143	0.12987
10	2	14	TD	1.9	0.8	23.4	4.8	9.8	1.5	0.73	13.3	3.6	6.5	0.68	0.51	20.7	10.1	15.5	0.27	0.0572557	0.372162	0.111073

## Sheet: Flow cytometry
Nº stallion	Fertile/subfertile	Age	Nº Ejaculate	Intactos/T0	YoPro/T0	(Yo-pro/ Eth)T0	Eth/T0	Intactos/T24	YoPro/T24	(Yo-pro/ Eth)T24	Eth/T24	Intactos/T48	YoPro/T48	(Yo-pro/ Eth)T48	Eth/T48	(Mitot-/Eth-)/T0	Mitot+/T0	(Mitot+/Eth+)/T0	Eth+/T0	(Mitot-/Eth-)/T24	Mitot+/T24	(Mitot+/Eth+)/T24	Eth+/T24	(Mitot-/Eth-)/T48	Mitot+/T48	(Mitot+/Eth+)/T48	Eth+/T48	SCSA/T0	SCSA/T24	SCSA/T48
1	1	7	1	67.21	14.85	17.92	0.01	73.51	1.61	1.71	23.16	69.98	7.07	21.57	1.38	12.65	71.04	0.6	15.71	6.47	69.86	4.35	19.32	13.37	68.95	1.04	16.64	4.19	7.71	8.35
1	1	7	2	85.53	0.99	11.4	2.08	80.31	9.42	9.7	0.57	81	2.44	9.69	6.86	3.37	84.87	1.53	10.24	15.09	78.72	0.57	5.62	6.16	78.79	1.1	13.95	6.36	6.18	6.32
2	1	17	1	74.15	10.13	15.68	0.04	70.13	2.22	13.84	13.82	68.47	2.99	26.17	2.36	1.69	82.86	0.94	14.51	4.47	68.46	4.15	22.92	5.6	66.17	15.27	12.96	5.13	7.31	7.51
2	1	17	2	80.55	1.19	14.97	3.29	70.56	6.09	2.93	20.42	71.93	0	0	28.07	0.2	81.58	17.55	0.67	6.05	70.66	22.2	1.09	4.09	67.88	27.38	0.64	4.81	5.89	5.64
3	1	9	1	85.92	0.46	5.59	8.02	73.28	2.93	7.7	16.09	70.05	0.8	4.11	25.04	0.99	85.71	4.99	8.31	6.43	70.55	6.59	16.42	5.06	66.58	2.29	26.07	8.8	5.78	8.21
3	1	9	2	72.54	0.83	12.9	13.73	69.43	0.02	0.05	30.49	66.03	0.01	0.02	33.94	0.44	73.01	24.5	2.06	3.55	65.97	24.38	6.11	6.17	60.11	27.3	6.43	5.44	6.69	7.42
4	1	7	1	89.5	0.16	0.26	10.08	83.87	2.91	8.88	4.34	84.05	0.45	1.51	13.99	1.09	88.77	1.26	8.88	4.91	82.5	0.55	12.04	2.69	82.54	1.55	13.22	6.9	5.02	5.12
4	1	7	2	89.21	0.12	0.46	10.21	82.65	0.01	0.06	17.28	81.36	0.01	0.02	18.61	1.59	87.82	4.15	6.44	2.09	80.67	11.52	5.72	5.04	76.62	5.12	13.23	5.99	7.04	5.46
5	1	6	1	73.97	6.48	19.52	0.03	72.52	2.24	4.25	21	68.52	6.11	25.02	0.35	11.14	71.67	0.51	16.68	1.11	74.31	20.9	3.68	8.89	68.71	5.67	16.74	8.33	12.13	7.58
5	1	6	2	78.6	6.73	13.52	1.16	72.92	2.85	8.52	15.71	72.47	1.38	5.28	20.87	1.93	83.52	10.83	3.72	5.34	70.66	11.68	12.31	7.13	67.18	10.05	15.64	7.28	8.38	9.49
6	1	18	1	85.74	2.18	12.07	0.02	78.07	2.74	2.08	17.12	72.34	4.51	22.65	0.5	1.77	86.67	1.26	10.3	1.17	80.19	15.86	2.79	5.92	71.83	11.03	11.23	9.05	9.65	9.64
6	1	18	2	68.32	2.48	22.23	6.96	26.48	24.91	10.75	37.86	6.55	5.28	16.22	71.95	0.77	70.12	28.43	0.68	20.7	31.28	40.6	7.42	0.19	12.14	87.26	0.41	9.12	9.73	9.67
7	1	18	1	66.17	0.46	2.99	30.38	62.83	1.59	15.44	20.15	58.2	2.09	8.29	31.43	0.98	65.88	8.29	24.85	3.14	61.78	8.47	26.61	4.15	57.02	7.9	30.93	4.74	11	11.06
7	1	18	2	72.8	0.78	12.5	13.92	70.9	0.46	1.6	27.03	68.07	0.06	0.39	31.48	0.77	72.92	16.42	9.89	2.57	68.84	16.75	11.84	3.74	64.5	16.05	15.71	10.49	13.84	17.78
8	2	15	1	69.88	3.42	13.13	13.57	4.74	63.2	31.66	0.4	12.53	55.31	17.14	15.02	4.47	73.99	12.77	8.77	0.85	76.07	19.5	3.58	11.21	68.89	18.68	1.22	12.73	12.92	14.25
8	2	15	2	81.62	0.66	1.45	16.27	48.28	1.66	3	47.06	42.07	0.69	1.95	55.29	0.22	82.18	15.06	2.54	0.05	51.53	46.45	1.98	0.5	46.14	50.66	2.7	14.36	15.93	12.39
9	2	14	1	48.01	1.87	25.33	24.79	17.69	0.05	0.47	81.8	6.94	0.14	2.07	90.85	0.93	49.1	34.53	15.44	0.5	17.65	64.51	17.34	0.36	7.03	76	16.6	20.88	23.07	22.38
9	2	14	2	56.29	0.06	0.22	43.43	35.66	0.01	0.03	64.31	23.57	0.73	2.5	73.2	1.85	54.78	23.61	19.76	1.93	35.16	39.36	23.56	2.06	24.35	46.32	27.27	12.58	19.31	23.5
10	2	14	1	58.945	2.645	19.23	19.18	11.215	31.625	16.065	41.1	9.735	27.725	9.605	52.935	2.7	61.545	23.65	12.105	0.675	46.86	42.005	10.46	5.785	37.96	47.34	8.91	16.805	17.995	18.315
10	2	14	2	68.955	0.36	0.835	29.85	41.97	0.835	1.515	55.685	32.82	0.71	2.225	64.245	1.035	68.48	19.335	11.15	0.99	43.345	42.905	12.77	1.28	35.245	48.49	14.985	13.47	17.62	17.945

## Sheet: Means
Testis	PI/ST	RI/ST	PSV/ST	EDV/ST	TAMV/ST		Nº stallion	Fertile/subfertile	ALIVE/T0	YoPro/T0	(Yo-pro/ Eth)T0	Eth/T0	(Mitot-/Eth-)/T0	Mitot+/T0	(Mitot+/Eth+)/T0	Eth+/T0	SCSA/T0
TI	2.33333	0.82	20.3667	3.6	7.2		1	1	76.37	7.92	14.66	1.045	8.01	77.955	1.065	12.975	5.275
TD	2.14	0.746667	29.9	7.6	10.4333		1	1
TI	2.89	0.876667	30.7667	3.8	9.33333		2	1	77.35	5.66	15.325	1.665	0.945	82.22	9.245	7.59	4.97
TD	2.68333	0.816667	24.5	4.5	7.5		2	1
TI	1.56	0.726667	18.0667	5	8.4		3	1	79.23	0.645	9.245	10.875	0.715	79.36	14.745	5.185	7.12
TD	2.11333	0.79	20.0667	4.23333	7.53333		3	1
TI	1.86	0.753333	27.8667	6.86667	11.3		4	1	89.355	0.14	0.36	10.145	1.34	88.295	2.705	7.66	6.445
TD	1.58667	0.733333	19.2667	5.06667	8.93333		4	1
TI	2.49	0.813333	25.4333	4.73333	8.3		5	1	76.285	6.605	16.52	0.595	6.535	77.595	5.67	10.2	7.805
TD	1.9	0.763333	20	4.7	8.06667		5	1
TI	2.72333	0.826667	28.0667	4.86667	8.56667		6	1	77.03	2.33	17.15	3.49	1.27	78.395	14.845	5.49	9.085
TD	2.36333	0.793333	27.1667	5.6	9.16667		6	1
TI	2.77333	0.876667	41.2333	4.96667	13.0333		7	1	69.485	0.62	7.745	22.15	0.875	69.4	12.355	17.37	7.615
TD	2.56333	0.856667	16.8	2.36667	5.66667		7	1
TI							8	2	75.75	2.04	7.29	14.92	2.345	78.085	13.915	5.655	13.545
TD	1.59	0.71	27.7	8	12.4		8	2
TI	3.83478	0.863585	32.1667	3.86667	7.2		9	2	52.15	0.965	12.775	34.11	1.39	51.94	29.07	17.6	16.73
TD	3.69276	0.832524	20.8667	3.5	4.8		9	2
TI	2.71333	0.863333	25.6333	3.5	8.16667		10	2	63.95	1.5025	10.0325	24.515	1.8675	65.0125	21.4925	11.6275	15.1375
TD	1.72333	0.746667	22.9333	5.76667	10		10	2
Testis	PI/CA	RI/CA	PSV/CA	EDV/CA	TAMV/CA		Nº stallion	Fertile/subfertile	ALIVE/T24	YoPro/T24	(Yo-pro/ Eth)T24	Eth/T24	(Mitot-/Eth-)/T24	Mitot+/T24	(Mitot+/Eth+)/T24	Eth+/T24	SCSA/T24
TI	1.44	0.7	18.2	5.46667	8.9		1	1	76.91	5.515	5.705	11.865	10.78	74.29	2.46	12.47	6.945
TD	1.07	0.586667	22.4667	9.23333	12.3333		1	1
TI	1.33	0.636667	20.2333	7.36667	9.8		2	1	70.345	4.155	8.385	17.12	5.26	69.56	13.175	12.005	6.6
TD	1.88667	0.753333	19.5	4.83333	7.8		2	1
TI	1.40333	0.68	16.6667	5.23333	8.1		3	1	71.355	1.475	3.875	23.29	4.99	68.26	15.485	11.265	6.235
TD	1.19	0.663333	17.5333	5.96667	9.83333		3	1
TI	1.04667	0.616667	12.3333	4.73333	7.23333		4	1	83.26	1.46	4.47	10.81	3.5	81.585	6.035	8.88	6.03
TD	0.89	0.55	13.9	6.33333	8.56667		4	1
TI	1.21	0.653333	16.1333	5.63333	8.7		5	1	72.72	2.545	6.385	18.355	3.225	72.485	16.29	7.995	10.255
TD	1.32	0.663333	15	5.06667	7.53333		5	1
TI	1.70667	0.7	17.5667	5.2	7.23333		6	1	52.275	13.825	6.415	27.49	10.935	55.735	28.23	5.105	9.69
TD	1.78	0.726667	25.6667	7.03333	10.4333		6	1
TI	2.28333	0.813333	19.7333	3.73333	7.1		7	1	66.865	1.025	8.52	23.59	2.855	65.31	12.61	19.225	12.42
TD	2.02333	0.823333	24.7667	4.4	10.0667		7	1
TI							8	2	26.51	32.43	17.33	23.73	0.45	63.8	32.975	2.78	14.425
TD	1.11	0.643333	15.0667	5.43333	8.6		8	2
TI	2.99009	0.795854	15.5	3	4.13333		9	2	26.675	0.03	0.25	73.055	1.215	26.405	51.935	20.45	21.19
TD	2.70777	0.756106	12.6	3.1	3.6		9	2
TI	1.79333	0.77	15.1333	3.7	6.43333		10	2	26.5925	16.23	8.79	48.3925	0.8325	45.1025	42.455	11.615	17.8075
TD	1.36	0.683333	13.0667	4.1	6.66667		10	2
Testis	PI/IA	RI/IA	PVS/IA	EDV/IA	TAVM/IA		Nº stallion	Fertile/subfertile	ALIVE/T48	YoPro/T48	(Yo-pro/ Eth)T48	Eth/T48	(Mitot-/Eth-)/T48	Mitot+/T48	(Mitot+/Eth+)/T48	Eth+/T48	SCSA/T48
TI	0.716667	0.476667	8.5	4.4	5.63333		1	1	75.49	4.755	15.63	4.12	9.765	73.87	1.07	15.295	7.335
TD	0.763333	0.506667	10.8667	5.33333	7.3		1	1
TI	1.12667	0.63	9.8	3.63333	5.46667		2	1	70.2	1.495	13.085	15.215	4.845	67.025	21.325	6.8	6.575
TD	0.763333	0.52	6.66667	3.2	4.5		2	1
TI	1.01	0.626667	11.3	4.2	7.03333		3	1	68.04	0.405	2.065	29.49	5.615	63.345	14.795	16.25	7.815
TD	1.08333	0.66	7.93333	2.66667	4.86667		3	1
TI	0.6	0.456667	9.5	5.13333	7.23333		4	1	82.705	0.23	0.765	16.3	3.865	79.58	3.335	13.225	5.29
TD	0.636667	0.476667	8.63333	4.53333	6.5		4	1
TI	0.746667	0.53	8.7	4.1	6.16667		5	1	70.495	3.745	15.15	10.61	8.01	67.945	7.86	16.19	8.535
TD	0.783333	0.536667	10.6667	4.93333	7.3		5	1
TI	1.26	0.686667	11.6667	3.66667	6.4		6	1	39.445	4.895	19.435	36.225	3.055	41.985	49.145	5.82	9.655
TD	1.10667	0.676667	12.0333	3.9	7.3		6	1
TI	0.976667	0.596667	16.6333	6.76667	10.3667		7	1	63.135	1.075	4.34	31.455	3.945	60.76	11.975	23.32	14.42
TD	1.01667	0.606667	8.2	3.2	4.9		7	1
TI							8	2	27.3	28	9.545	35.155	5.855	57.515	34.67	1.96	13.32
TD	0.656667	0.51	8.46667	4.16667	6.56667		8	2
TI	1.11333	0.643333	9.63333	3.5	5.56667		9	2	15.255	0.435	2.285	82.025	1.21	15.69	61.16	21.935	22.94
TD	1.15	0.706667	8.6	2.53333	5.3		9	2
TI	0.636667	0.473333	7.13333	3.73333	5.23333		10	2	21.2775	14.2175	5.915	58.59	3.5325	36.6025	47.915	11.9475	18.13
TD	0.7	0.493333	15.5667	7.53333	11.1667		10	2
Testis	TABF	TABF ratio
TI	0.715782	0.208774
TD	1.18661	0.346101
TI	0.739674	0.300205
TD	0.58872	0.238938
TI	0.824482	0.201118
TD	0.94608	0.230779
TI	0.327229	0.0709994
TD	0.355925	0.0772256
TI	0.699697	0.176464
TD	0.724793	0.182793
TI	0.820345	0.188672
TD	1.00381	0.230866
TI	0.607263	0.137499
TD	0.759801	0.172037
TI
TD	0.780813	0.420199
TI	0.0831058	0.0595954
TD	0.0723825	0.0519057
TI	0.485568	0.14492
TD	0.381704	0.113921

## Sheet: ROC Curve
						Coordenadas de la curva
						Variables resultado de contraste:	TABF		Sanos
						Positivo si es mayor o igual quea	Sensibilidad	1 - Especificidad	Especificidad	Indice de Youden		Área bajo la curva
						-0.937671	1	1	0	0		Variables resultado de contraste:	TABF
						0.06434	1	0.933333	0.0666667	0.0666667		Área	Error típ.a	Sig. asintóticab	Intervalo de confianza asintótico al 95%
						0.0703718	1	0.866667	0.133333	0.133333					Límite inferior	Límite superior
						0.0794196	1	0.8	0.2	0.2		0.834921	0.0645008	0.00013144	0.708501	0.96134
						0.0864568	1	0.733333	0.266667	0.266667		a. Bajo el supuesto no paramétrico
						0.0894728	1	0.666667	0.333333	0.333333		b. Hipótesis nula: área verdadera = 0,5
						0.196888	1	0.6	0.4	0.4
						0.307724	0.97619	0.6	0.4	0.37619
						0.316673	0.952381	0.6	0.4	0.352381
						0.329503	0.928571	0.6	0.4	0.328571
						0.341327	0.928571	0.533333	0.466667	0.395238
						0.346593	0.904762	0.533333	0.466667	0.371429
						0.360251	0.880952	0.533333	0.466667	0.347619
						0.395897	0.880952	0.466667	0.533333	0.414286
						0.421151	0.857143	0.466667	0.533333	0.390476
						0.428907	0.857143	0.4	0.6	0.457143
						0.459098	0.857143	0.333333	0.666667	0.52381
						0.515222	0.857143	0.266667	0.733333	0.590476
						0.549187	0.833333	0.266667	0.733333	0.566667
						0.560497	0.833333	0.2	0.8	0.633333
						0.571818	0.809524	0.2	0.8	0.609524
						0.581891	0.785714	0.2	0.8	0.585714
						0.593213	0.761905	0.2	0.8	0.561905
						0.611363	0.714286	0.2	0.8	0.514286
						0.630727	0.690476	0.2	0.8	0.490476
						0.635177	0.666667	0.2	0.8	0.466667
						0.6434	0.642857	0.2	0.8	0.442857
						0.657113	0.619048	0.2	0.8	0.419048
						0.673198	0.619048	0.133333	0.866667	0.485714
						0.683926	0.595238	0.133333	0.866667	0.461905
						0.687948	0.571429	0.133333	0.866667	0.438095
						0.692189	0.547619	0.133333	0.866667	0.414286
						0.69621	0.52381	0.133333	0.866667	0.390476
						0.713018	0.5	0.133333	0.866667	0.366667
						0.733006	0.5	0.0666667	0.933333	0.433333
						0.744096	0.452381	0.0666667	0.933333	0.385714
						0.756277	0.428571	0.0666667	0.933333	0.361905
						0.768058	0.404762	0.0666667	0.933333	0.338095
						0.774746	0.380952	0.0666667	0.933333	0.314286
						0.787984	0.357143	0.0666667	0.933333	0.290476
						0.799306	0.333333	0.0666667	0.933333	0.266667
						0.807603	0.309524	0.0666667	0.933333	0.242857
						0.821285	0.285714	0.0666667	0.933333	0.219048
						0.833333	0.261905	0.0666667	0.933333	0.195238
						0.842954	0.238095	0.0666667	0.933333	0.171429
						0.859966	0.214286	0.0666667	0.933333	0.147619
						0.913295	0.190476	0.0666667	0.933333	0.12381
						0.962527	0.190476	0	1	0.190476
						0.976547	0.166667	0	1	0.166667
						1.01984	0.142857	0	1	0.142857
						1.10643	0.119048	0	1	0.119048
						1.17378	0.0952381	0	1	0.0952381
						1.20264	0.0714286	0	1	0.0714286
						1.23213	0.0238095	0	1	0.0238095
						2.25199	0	0	1	0
						a. El menor valor de corte es el valor de contraste observado mínimo menos 1, mientras que el mayor valor de corte es el valor de contraste observado máximo más 1. Todos los demás valores de corte son la media de dos valores de contraste observados ordenados y consecutivos.
						Variables resultado de contraste:	VDFPT		Sanos
						Positivo si es mayor o igual quea	Sensibilidad	1 - Especificidad	Especificidad	Indice de Youden
						1.3	1	1	0	0		Área bajo la curva
						2.6	1	0.933333	0.0666667	0.0666667		Variables resultado de contraste:	VDFPT
						3	0.97619	0.866667	0.133333	0.109524		Área	Error típ.a	Sig. asintóticab	Intervalo de confianza asintótico al 95%
						3.15	0.97619	0.733333	0.266667	0.242857					Límite inferior	Límite superior
						3.25	0.97619	0.666667	0.333333	0.309524		0.876984	0.0577034	1.67759e-05	0.763888	0.990081
						3.45	0.97619	0.6	0.4	0.37619		La variable (o variables) de resultado de contraste: VDFPT tiene al menos un empate entre el grupo de estado real positivo y el grupo de estado real negativo. Los estadísticos pueden estar sesgados .
						3.75	0.97619	0.4	0.6	0.57619		a. Bajo el supuesto no paramétrico
						4	0.928571	0.333333	0.666667	0.595238		b. Hipótesis nula: área verdadera = 0,5
						4.15	0.904762	0.333333	0.666667	0.571429
						4.25	0.880952	0.266667	0.733333	0.614286
						4.35	0.833333	0.2	0.8	0.633333
						4.45	0.785714	0.2	0.8	0.585714
						4.6	0.738095	0.2	0.8	0.538095
						4.75	0.714286	0.2	0.8	0.514286
						4.85	0.714286	0.133333	0.866667	0.580952
						4.95	0.690476	0.0666667	0.933333	0.62381
						5.1	0.595238	0.0666667	0.933333	0.528571
						5.25	0.571429	0.0666667	0.933333	0.504762
						5.35	0.452381	0.0666667	0.933333	0.385714
						5.55	0.404762	0.0666667	0.933333	0.338095
						5.75	0.380952	0.0666667	0.933333	0.314286
						5.95	0.333333	0.0666667	0.933333	0.266667
						6.3	0.285714	0.0666667	0.933333	0.219048
						6.55	0.261905	0.0666667	0.933333	0.195238
						6.8	0.238095	0.0666667	0.933333	0.171429
						7.1	0.214286	0.0666667	0.933333	0.147619
						7.25	0.214286	0	1	0.214286
						7.35	0.166667	0	1	0.166667
						7.6	0.142857	0	1	0.142857
						7.9	0.119048	0	1	0.119048
						8.05	0.0952381	0	1	0.0952381
						8.25	0.0714286	0	1	0.0714286
						8.95	0.047619	0	1	0.047619
						9.65	0.0238095	0	1	0.0238095
						10.8	0	0	1	0
						La variable (o variables) de resultado de contraste: VDFPT tiene al menos un empate entre el grupo de estado real positivo y el grupo de estado real negativo.
						a. El menor valor de corte es el valor de contraste observado mínimo menos 1, mientras que el mayor valor de corte es el valor de contraste observado máximo más 1. Todos los demás valores de corte son la media de dos valores de contraste observados ordenados y consecutivos.
						Coordenadas de la curva			Sanos
						Variables resultado de contraste:	TAMVPT
						Positivo si es mayor o igual quea	Sensibilidad	1 - Especificidad	Especificidad	Indice de Youden
						2.1	1	1	0	0		Área bajo la curva
						3.2	1	0.933333	0.0666667	0.0666667		Variables resultado de contraste:	TAMVPT
						3.5	1	0.866667	0.133333	0.133333		Área	Error típ.a	Sig. asintóticab	Intervalo de confianza asintótico al 95%
						3.95	1	0.8	0.2	0.2					Límite inferior	Límite superior
						4.3	1	0.733333	0.266667	0.266667		0.859524	0.0613025	4.04954e-05	0.739373	0.979674
						4.45	1	0.666667	0.333333	0.333333		La variable (o variables) de resultado de contraste: TAMVPT tiene al menos un empate entre el grupo de estado real positivo y el grupo de estado real negativo. Los estadísticos pueden estar sesgados .
						5.05	1	0.6	0.4	0.4		a. Bajo el supuesto no paramétrico
						5.75	0.97619	0.533333	0.466667	0.442857		b. Hipótesis nula: área verdadera = 0,5
						6.15	0.97619	0.466667	0.533333	0.509524
						6.45	0.928571	0.4	0.6	0.528571
						6.55	0.928571	0.333333	0.666667	0.595238
						6.75	0.880952	0.333333	0.666667	0.547619
						7	0.833333	0.333333	0.666667	0.5
						7.15	0.809524	0.333333	0.666667	0.47619
						7.25	0.785714	0.333333	0.666667	0.452381
						7.35	0.761905	0.2	0.8	0.561905
						7.5	0.738095	0.2	0.8	0.538095
						7.65	0.714286	0.133333	0.866667	0.580952
						7.8	0.666667	0.133333	0.866667	0.533333
						7.95	0.595238	0.133333	0.866667	0.461905
						8.15	0.571429	0.0666667	0.933333	0.504762
						8.4	0.5	0.0666667	0.933333	0.433333
						8.55	0.47619	0.0666667	0.933333	0.409524
						8.65	0.428571	0.0666667	0.933333	0.361905
						8.75	0.404762	0.0666667	0.933333	0.338095
						9.15	0.380952	0.0666667	0.933333	0.314286
						9.55	0.357143	0.0666667	0.933333	0.290476
						9.7	0.333333	0.0666667	0.933333	0.266667
						9.95	0.285714	0.0666667	0.933333	0.219048
						10.15	0.238095	0.0666667	0.933333	0.171429
						10.25	0.214286	0.0666667	0.933333	0.147619
						10.4	0.190476	0.0666667	0.933333	0.12381
						10.55	0.190476	0	1	0.190476
						10.7	0.166667	0	1	0.166667
						10.9	0.142857	0	1	0.142857
						11.5	0.119048	0	1	0.119048
						12.15	0.0952381	0	1	0.0952381
						12.35	0.0714286	0	1	0.0714286
						12.5	0.047619	0	1	0.047619
						13.6	0	0	1	0
						La variable (o variables) de resultado de contraste: TAMVPT tiene al menos un empate entre el grupo de estado real positivo y el grupo de estado real negativo.
						a. El menor valor de corte es el valor de contraste observado mínimo menos 1, mientras que el mayor valor de corte es el valor de contraste observado máximo más 1. Todos los demás valores de corte son la media de dos valores de contraste observados ordenados y consecutivos.
						Coordenadas de la curva
						Variables resultado de contraste:	øarteriacm		Sanos
						Positivo si es mayor o igual quea	Sensibilidad	1 - Especificidad	Especificidad	Indice de Youden
						0	1	1	0	0		Área bajo la curva
						0.195	1	0.6	0.4	0.4		Variables resultado de contraste:	øarteriacm
						0.235	0.928571	0.6	0.4	0.328571		Área	Error típ.a	Sig. asintóticab	Intervalo de confianza asintótico al 95%
						0.255	0.857143	0.6	0.4	0.257143					Límite inferior	Límite superior
						0.29	0.857143	0.4	0.6	0.457143		0.807143	0.0644731	0.000453856	0.680778	0.933508
						0.315	0.642857	0.2	0.8	0.442857		La variable (o variables) de resultado de contraste: øarteriacm tiene al menos un empate entre el grupo de estado real positivo y el grupo de estado real negativo. Los estadísticos pueden estar sesgados .
						0.325	0.5	0.2	0.8	0.3		a. Bajo el supuesto no paramétrico
						0.335	0.428571	0.2	0.8	0.228571		b. Hipótesis nula: área verdadera = 0,5
						0.345	0.428571	0	1	0.428571
						0.355	0.142857	0	1	0.142857
						0.37	0.0714286	0	1	0.0714286
						1	0	0	1	0
						La variable (o variables) de resultado de contraste: øarteriacm tiene al menos un empate entre el grupo de estado real positivo y el grupo de estado real negativo.
						a. El menor valor de corte es el valor de contraste observado mínimo menos 1, mientras que el mayor valor de corte es el valor de contraste observado máximo más 1. Todos los demás valores de corte son la media de dos valores de contraste observados ordenados y consecutivos.
						Coordenadas de la curva
						Variables resultado de contraste:	PVSPT
						Positivo si es mayor o igual quea	Sensibilidad	1 - Especificidad	specificidad	Indice de youden
						10.7	1	1	0	0
						11.85	0.97619	1	0	-0.0238095
						12.15	0.97619	0.933333	0.0666667	0.0428571
						12.35	0.952381	0.866667	0.133333	0.0857143
						12.45	0.952381	0.8	0.2	0.152381
						12.55	0.928571	0.8	0.2	0.128571
						12.65	0.880952	0.733333	0.266667	0.147619
						12.75	0.880952	0.666667	0.333333	0.214286
						12.85	0.880952	0.6	0.4	0.280952
						12.95	0.857143	0.6	0.4	0.257143
						13.1	0.809524	0.6	0.4	0.209524
						13.25	0.809524	0.533333	0.466667	0.27619
						13.45	0.809524	0.466667	0.533333	0.342857
						14	0.809524	0.4	0.6	0.409524
						14.75	0.785714	0.333333	0.666667	0.452381
						15.3	0.785714	0.266667	0.733333	0.519048
						15.7	0.738095	0.266667	0.733333	0.471429
						16	0.738095	0.2	0.8	0.538095
						16.2	0.714286	0.2	0.8	0.514286
						16.4	0.690476	0.2	0.8	0.490476
						16.65	0.666667	0.2	0.8	0.466667
						16.85	0.642857	0.2	0.8	0.442857
						16.95	0.619048	0.2	0.8	0.419048
						17.1	0.619048	0.133333	0.866667	0.485714
						17.35	0.595238	0.133333	0.866667	0.461905
						17.8	0.571429	0.0666667	0.933333	0.504762
						18.25	0.52381	0.0666667	0.933333	0.457143
						18.55	0.5	0.0666667	0.933333	0.433333
						18.8	0.47619	0.0666667	0.933333	0.409524
						19	0.452381	0.0666667	0.933333	0.385714
						19.2	0.428571	0.0666667	0.933333	0.361905
						19.4	0.428571	0	1	0.428571
						19.6	0.404762	0	1	0.404762
						19.8	0.357143	0	1	0.357143
						20.15	0.333333	0	1	0.333333
						20.5	0.309524	0	1	0.309524
						20.7	0.261905	0	1	0.261905
						20.95	0.238095	0	1	0.238095
						21.85	0.214286	0	1	0.214286
						23.15	0.190476	0	1	0.190476
						23.75	0.166667	0	1	0.166667
						24.05	0.142857	0	1	0.142857
						24.45	0.119048	0	1	0.119048
						24.65	0.0952381	0	1	0.0952381
						25.05	0.0714286	0	1	0.0714286
						25.8	0.047619	0	1	0.047619
						26.55	0.0238095	0	1	0.0238095
						27.9	0	0	1	0
						La variable (o variables) de resultado de contraste: PVSPT tiene al menos un empate entre el grupo de estado real positivo y el grupo de estado real negativo.
						a. El menor valor de corte es el valor de contraste observado mínimo menos 1, mientras que el mayor valor de corte es el valor de contraste observado máximo más 1. Todos los demás valores de corte son la media de dos valores de contraste observados ordenados y consecutivos.
